# Supplementary material for: RCVS: by clinicians for clinicians—a narrative review
Source: Springer Nature journal article supplement (doi:10.1007/s00415-022-11425-z), 2022-10-28
Supplement: MOESM1 [file 23650746]

## RCVS – by clinicians for clinicians: a narrative review

### Journal of Neurology

Deborah Katharina Erhart<sup>1\*</sup>, Albert Christian Ludolph<sup>1</sup>, Katharina Althaus<sup>1</sup>

<sup>1</sup>University of Ulm, Department of Neurology, Oberer Eselsberg 45, 89081 Ulm, Germany

\*Corresponding author: [Deborah.Erhart@rku.de](mailto:Deborah.Erhart@rku.de)

| Author/year/reference     | Cases/sex (m/f) | Risk factor/trigger                            | Clinical features                                                    | Complications                                      |
|---------------------------|-----------------|------------------------------------------------|----------------------------------------------------------------------|----------------------------------------------------|
| Liao et al., 2003 [55]    | 4 (-/4)         | Bathing                                        | TCH (all)                                                            | Small cerebellar ischemia and PRES (one patient)   |
| Mak et al., 2005 [62]     | 6 (-/6)         | Bathing                                        | TCH (all)                                                            | Small ischemia in both frontal lobes (one patient) |
| Kato et al., 2018 [63]    | 1 (-/1)         | Coughing                                       | TCH                                                                  | Cerebral infarcts in both parietal lobes           |
| Theeler et al., 2010 [20] | 1 (1/-)         | Sexual activity                                | TCH                                                                  | None                                               |
| Komatsu et al., 2014 [19] | 1 (-/1)         | Physical exertion, coughing, Valsalva maneuver | TCH, transient homonymous left hemianopsia, facial sensory deficit   | cSAH                                               |
| Wong et al., 2009 [64]    | 2 (-/2)         | 1.+2. Physical exertion, THC                   | 1. Recurrent TCH<br>2. TCH, transient dysphasia and left leg paresis | 1. Atypically located ICH, SDH<br>2. None          |

|                               |         |                                                                                                                                                                                                                                 |                                                                                                                                                                                                    |                                                                                                                                                                                                                                                                                      |
|-------------------------------|---------|---------------------------------------------------------------------------------------------------------------------------------------------------------------------------------------------------------------------------------|----------------------------------------------------------------------------------------------------------------------------------------------------------------------------------------------------|--------------------------------------------------------------------------------------------------------------------------------------------------------------------------------------------------------------------------------------------------------------------------------------|
| Uhegwu et al., 2015 [21]      | 1 (1/-) | THC                                                                                                                                                                                                                             | Right hemiparesis, aphasia, left gaze deviation                                                                                                                                                    | Cerebral infarcts located in the left thalamus and left parietal lobe                                                                                                                                                                                                                |
| Roberts et Sowers, 2020 [22]  | 1 (1/-) | THC                                                                                                                                                                                                                             | Recurrent TCH                                                                                                                                                                                      | None                                                                                                                                                                                                                                                                                 |
| Hu et al., 2010 [65]          | 1 (-/1) | Amphetamine derivatives, postpartum, sexual activity                                                                                                                                                                            | TCH                                                                                                                                                                                                | None                                                                                                                                                                                                                                                                                 |
| Marder et al., 2012 [23]      | 6 (1/5) | <ol style="list-style-type: none"> <li>1. Traumatic brain injury</li> <li>2. Amphetamine derivatives, THC</li> <li>3. Caffeine, nicotine</li> <li>4. Bathing, triptans, ergotamine</li> <li>5. SSRI</li> <li>6. SSRI</li> </ol> | <ol style="list-style-type: none"> <li>1. Left-sided hemiplegia</li> <li>2. Disorientation, ataxia</li> <li>3. Disorientation</li> <li>4. Recurrent TCH</li> <li>5. TCH</li> <li>6. TCH</li> </ol> | <ol style="list-style-type: none"> <li>1. cerebral infarction in both anterior circulations, atypically located ICH</li> <li>2. cSAH</li> <li>3. Atypically located ICH, SDH</li> <li>4. Atypically located ICH, SDH</li> <li>5. cSAH</li> <li>6. SAH, atypically located</li> </ol> |
| Baharith et Zarrin, 2016 [24] | 1 (-/1) | Khat                                                                                                                                                                                                                            | Right-sided hemiparesis, aphasia                                                                                                                                                                   | Ischemic infarct in the left frontal lobe                                                                                                                                                                                                                                            |
| Singhal et al., 2002 [13]     | 3 (1/2) | <ol style="list-style-type: none"> <li>1. SSRI</li> <li>2. SSRI</li> <li>3. Triptan</li> </ol>                                                                                                                                  | <ol style="list-style-type: none"> <li>1. Right-hemianopsia</li> <li>2. Weakness of the left hand</li> <li>3. Generalized seizure</li> </ol>                                                       | <ol style="list-style-type: none"> <li>1. Cerebral infarction in the parieto-occipital lobe</li> <li>2. watershed infarcts</li> <li>3. watershed infarcts</li> </ol>                                                                                                                 |

|                            |         |                                                                             |                                                                                                                               |                                                                                                                                           |
|----------------------------|---------|-----------------------------------------------------------------------------|-------------------------------------------------------------------------------------------------------------------------------|-------------------------------------------------------------------------------------------------------------------------------------------|
| John et al., 2013 [49]     | 2 (-/2) | 1. SSRI, THC, ergotamine, hydromorphone<br>2. Combination of SDNRI and SSRI | 1. TCH, disturbance of consciousness up to coma<br>2. Serotonergic syndrome, TCH, generalized seizure, left-sided hemiparesis | 1. PRES, SAH, cerebral infarcts in the right cerebellum and in both frontal-parietal lobes<br>2. Cerebral infarcts in both parietal lobes |
| Manning et al., 2021 [51]  | 1 (-/1) | SSRI                                                                        | Left-sided hemiparesis                                                                                                        | Multiple right-stressed cerebral infarcts                                                                                                 |
| Zeitouni et al., 2021 [69] | 1 (-/1) | SNRI                                                                        | TCH, left-sided hemiparesis                                                                                                   | Cerebral infarcts in the right anterior and posterior circulation                                                                         |
| Koopman et al., 2008 [73]  | 2 (-/2) | 1. THC<br>2. THC, triptans                                                  | 1. Left-sided hemiparesis<br>2. TCH                                                                                           | 1. Multiple right-stressed cerebral infarcts<br>2. None                                                                                   |
| Meschia et al., 1998 [14]  | 1 (1/-) | Triptans, corticosteroids                                                   | TCH, right homonymous hemianopsia                                                                                             | Cerebral infarct in the left occipital lobe                                                                                               |
| Kato et al., 2016 [50]     | 2 (-/2) | 1. Triptans<br>2. Triptans, postpartum                                      | 1. TCH<br>2. TCH                                                                                                              | 1. SAH, PRES<br>2. None                                                                                                                   |
| Palma et al., 2012 [26]    | 1 (-/1) | Epinephrine                                                                 | Recurrent TCH, blurred vision                                                                                                 | Cerebral infarct in the right occipital lobe                                                                                              |
| Calic et al., 2014 [25]    | 1 (-1)  | Indomethacin                                                                | Recurrent TCH                                                                                                                 | None                                                                                                                                      |
| Kraemer et al., 2015 [54]  | 1 (-/1) | Fingolimod, high-dose corticosteroids                                       | Recurrent TCH, left hemianopsia                                                                                               | Cerebral infarct in the right occipital lobe                                                                                              |
| Erhart et al., 2022 [18]   | 1 (-/1) | Low-dose corticosteroids                                                    | Aphasia, left leg-stressed hemiparesis                                                                                        | Multiple cerebral infarctions in the anterior circulation                                                                                 |
| Moustafa et al, 2009 [109] | 3 (-/3) | 1. Phytoestrogens                                                           | 1. TCH                                                                                                                        | 1. SAH<br>2. cSAH                                                                                                                         |

|                                |            |                                                                 |                                                                                  |                                                                   |
|--------------------------------|------------|-----------------------------------------------------------------|----------------------------------------------------------------------------------|-------------------------------------------------------------------|
|                                |            | 2. Nasal decongestants (pseudoephedrine)                        | 2. TCH, paresis of the right hand<br>3. TCH                                      | 3. None                                                           |
| Cantu et al., 2003 [70]        | 22 (10/12) | Nasal decongestants (pseudoephedrine, phenylpropanolamine)      | TCH +/- focal neurological deficits                                              | Ischemic stroke (1/21), ICH (16/22), SAH (4/22), ICH + SAH (1/22) |
| Doss-Esper et al., 2006 [57]   | 1 (-/1)    | Intravenous immunoglobulins                                     | TCH, cortical blindness, confusion                                               | PRES, cSAH, multiple bilateral ischemic strokes                   |
| Saito et al, 2019 [59]         | 1 (-/1)    | Blood transfusion                                               | Coma (hemorrhagic shock)                                                         | PRES                                                              |
| Boughammoura et al., 2003 [58] | 1 (-/1)    | Blood transfusion                                               | Repeated focal and generalized seizures, status epilepticus                      | cSAH                                                              |
| Ray et al., 2022 [52]          | 1 (-/1)    | COVID-19                                                        | Quadriparesis, focal seizures, blurred vision                                    | PRES                                                              |
| Mansoor et al., 2021 [81]      | 1 (-/1)    | COVID-19                                                        | TCH, blurred vision                                                              | PRES                                                              |
| Dakay et al., 2020 [82]        | 1 (-/1)    | COVID-19, vertebral artery dissection                           | TCH                                                                              | cSAH                                                              |
| Singhal et al., 2004 [12]      | 4 (-/1)    | 1. Postpartum<br>2. Postpartum, SSRI<br>3. THC<br>4. Postpartum | 1. TCH<br>2. TCH, generalized seizures<br>3. TCH, generalized seizures<br>4. TCH | 1. PRES<br>2. PRES, cSAH<br>3. PRES<br>4. PRES                    |
| Feil et al., 2017 [33]         | 1 (-/1)    | Postpartum, CSF leakage                                         | Serial generalized seizures, coma                                                | PRES                                                              |
| Fugate et al., 2012 [47]       | 4 (-/4)    | 1. Postpartum<br>2. Postpartum                                  | 1. TCH, paresis of left arm and right leg                                        | 1. cSAH, ICH, multiple cerebral infarcts                          |

|                                  |         |                                                    |                                                                                                      |                                                                                                                               |
|----------------------------------|---------|----------------------------------------------------|------------------------------------------------------------------------------------------------------|-------------------------------------------------------------------------------------------------------------------------------|
|                                  |         | 3. Postpartum eclampsia<br>4. Postpartum eclampsia | 2. TCH, left hemiplegia, left hemineglect<br>3. Drowsiness, confusion<br>4. TCH, Generalized seizure | 2. ICH in the right basal ganglia<br>3. Global edema<br>4. Global edema                                                       |
| Hadhiah et al., 2021 [48]        | 1 (-/1) | Postpartum                                         | TCH, generalized seizures                                                                            | cSAH                                                                                                                          |
| Singhal et al., 2009 [74]        | 1 (-/1) | Postpartum eclampsia                               | TCH, right hemiparesis                                                                               | PRES, ischemic stroke in the left frontal lobe, ICH in the right frontal lobe                                                 |
| Pop et al., 2019 [35]            | 1 (-/1) | Postpartum eclampsia                               | TCH, seizures                                                                                        | PRES                                                                                                                          |
| English et Nasr, 2019 [68]       | 1 (-/1) | Pheochromocytoma                                   | Recurrent TCH                                                                                        | None                                                                                                                          |
| Togha et al., 2021 [60]          | 1 (-/1) | Pheochromocytoma                                   | Recurrent TCH                                                                                        | Small ICH in the right parietal lobe                                                                                          |
| Verillaud et al., 2010 [61]      | 2 (1/1) | Carotid glomus tumor +/- nasal decongestants       | Recurrent TCH                                                                                        | None                                                                                                                          |
| Lopez-Valdes et al., 1997 [27]   | 2 (1/1) | Carotid surgery (both)                             | 1. TCH, left hemianopsia, transient left hemiparesis<br>2. TCH, left hemianopsia, left hemineglect   | 1. Cerebral infarcts in the right frontal and occipital lobes<br>2. Ischemic stroke in the right parietal and occipital lobes |
| Rosenbloom et Singhal, 2007 [28] | 1 (-/1) | Carotid surgery, Valsalva maneuver                 | TCH, transient aphasia and paresis of the right hand                                                 | Multiple cerebral infarcts                                                                                                    |
| Noda et al., 2011 [106]          | 1 (-/1) | Unruptured aneurysm                                | TCH, generalized seizures, paresis of the left lower limb                                            | cSAH, PRES, ischemic stroke in the right frontal lobe and in both parietal lobes                                              |

**Online Resource 1** Case reports and case series describing risk factors and triggers of reversible cerebral vasoconstriction syndrome (RCVS), including their specialties. The numbers of the references refer to the bibliography in the main text.

Abbr.: TCH: thunderclap headache, PRES: posterior reversible vasoconstriction syndrome, SAH: subarachnoid hemorrhage, cSAH: convexity subarachnoid hemorrhage, SDH: subdural hemorrhage, ICH: intracranial hemorrhage, THC: tetrahydrocannabinol, SSRI: selective serotonin reuptake inhibitors, SNRI: serotonin and noradrenaline reuptake inhibitors, SDNRI: serotonin, dopamine and noradrenaline reuptake inhibitors, CSF: cerebrospinal fluid
